# Supplementary material for: Conversion of cellulose into aromatic compounds using supported metal catalysts in high-temperature water
Source: Royal Society of Chemistry journal article supplement (doi:10.1039/d3ra01939j), 2023-01-01
Supplement: d3ra01939j1.pdf [file d3ra01939j1.pdf]

## Supplementary Information

### Conversion of cellulose into aromatic compounds using supported metal catalysts in high-temperature water

Kiyoyuki Yamazaki<sup>a</sup>, Atsushi Segawa<sup>b</sup>, Hitoshi Mazaki<sup>b</sup>, Norihito Hiyoshi<sup>a</sup>, Naoki Mimura<sup>a</sup>,  
Osamu Sato<sup>a</sup>, and Aritomo Yamaguchi\*<sup>a</sup>

<sup>a</sup> *Research Institute for Chemical Process Technology, National Institute of Advanced Industrial Science and Technology (AIST), 4-2-1 Nigatake, Miyagino, Sendai 983-8551, Japan*

<sup>b</sup> *Central Technical Research Laboratory, ENEOS Corporation, 8 Chidoricho, Naka-ku, Yokohama 213-0815, Japan*

**Table S1**

Results of cellulose conversion into gaseous and solid products

| Reaction temperature (K) | Catalyst | Gas yield (C%) | Gas composition (%) |     |                 |                 |                               | Solid product yield (wt%) |
|--------------------------|----------|----------------|---------------------|-----|-----------------|-----------------|-------------------------------|---------------------------|
|                          |          |                | H <sub>2</sub>      | CO  | CH <sub>4</sub> | CO <sub>2</sub> | C <sub>2</sub> H <sub>6</sub> |                           |
| 473                      | None     | 0.6            | 0.7                 | 0.0 | 14              | 86              | 0.0                           | 99                        |
|                          | 5%Pt/C   | 2.3            | 7.1                 | 0.0 | 2.6             | 87              | 3.1                           | 83                        |
| 523                      | None     | 2.4            | 2.8                 | 0.0 | 0.0             | 97              | 0.0                           | 34                        |
|                          | 5%Pt/C   | 33             | 26                  | 0.8 | 5.8             | 63              | 4.3                           | 4.1                       |
| 573                      | None     | 4.5            | 6.9                 | 9.1 | 0.5             | 84              | 0.0                           | 28                        |
|                          | 5%Pt/C   | 34             | 15                  | 1.5 | 8.1             | 72              | 3.6                           | 1.7                       |
| 623                      | None     | 9.1            | 7.5                 | 14  | 1.6             | 76              | 0.3                           | 19                        |
|                          | 5%Pt/C   | 43             | 16                  | 0.4 | 9.5             | 70              | 3.8                           | 0.0                       |
| 673                      | None     | 17             | 11                  | 27  | 5.5             | 55              | 1.3                           | 13                        |
|                          | 5%Pt/C   | 46             | 13                  | 0.0 | 12              | 71              | 4.5                           | 0.0                       |
|                          | 5%Pd/C   | 33             | 19                  | 0.3 | 8.0             | 70              | 3.1                           | 0.0                       |
|                          | 5%Rh/C   | 50             | 7.0                 | 1.2 | 30              | 59              | 2.9                           | 0.0                       |
|                          | 5%Ru/C   | 80             | 4.0                 | 0.7 | 40              | 54              | 1.2                           | 0.0                       |

**Table S2**

Results of glucose conversion into gaseous and solid products

| Reaction<br>temperature (K) | Catalyst | Gas<br>yield<br>(C%) | Gas composition (%) |     |                 |                 |                               | Solid<br>product<br>yield<br>(wt%) |
|-----------------------------|----------|----------------------|---------------------|-----|-----------------|-----------------|-------------------------------|------------------------------------|
|                             |          |                      | H <sub>2</sub>      | CO  | CH <sub>4</sub> | CO <sub>2</sub> | C <sub>2</sub> H <sub>6</sub> |                                    |
| 673                         | None     | 22                   | 15                  | 0.0 | 6.0             | 74              | 4.9                           | 54                                 |
|                             | 5%Pt/C   | 43                   | 11                  | 0.3 | 12              | 71              | 5.7                           | 0.0                                |
|                             | 5%Pd/C   | 28                   | 14                  | 3.9 | 7.4             | 71              | 3.4                           | 0.0                                |

**Table S3**

Results of xylan conversion into gaseous and solid products

| Reaction<br>Temperatur<br>e (K) | Catalyst | Gas<br>yield<br>(C%) | Gas composition (%) |     |                 |                 |                               | Solid product<br>yield (wt%) |
|---------------------------------|----------|----------------------|---------------------|-----|-----------------|-----------------|-------------------------------|------------------------------|
|                                 |          |                      | H <sub>2</sub>      | CO  | CH <sub>4</sub> | CO <sub>2</sub> | C <sub>2</sub> H <sub>6</sub> |                              |
| 673                             | None     | 17                   | 22                  | 0.4 | 3.1             | 73              | 1.8                           | 6.3                          |
|                                 | 5%Pt/C   | 29                   | 32                  | 1.0 | 7.2             | 55              | 5.1                           | 0.0                          |
|                                 | 5%Pd/C   | 43                   | 27                  | 0.4 | 6.9             | 61              | 4.2                           | 1.9                          |

**Table S4**

Results of xylose conversion into gaseous and solid products

| Reaction<br>Temperatur<br>e (K) | Catalyst | Gas<br>yield<br>(C%) | Gas composition (%) |     |                 |                 |                               | Solid product<br>yield (wt%) |
|---------------------------------|----------|----------------------|---------------------|-----|-----------------|-----------------|-------------------------------|------------------------------|
|                                 |          |                      | H <sub>2</sub>      | CO  | CH <sub>4</sub> | CO <sub>2</sub> | C <sub>2</sub> H <sub>6</sub> |                              |
| 673                             | None     | 17                   | 13                  | 23  | 5.4             | 56              | 1.3                           | 6.0                          |
|                                 | 5%Pt/C   | 50                   | 11                  | 1.2 | 12              | 70              | 5.4                           | 0.0                          |
|                                 | 5%Pd/C   | 27                   | 14                  | 9.2 | 12              | 62              | 3.6                           | 0.2                          |
